# Supplementary material
Source: PubMed Central journal article supplement (PMC10251233)
Supplement: NIHMS1893518-supplement-2.pdf [file NIHMS1893518-supplement-2.pdf]

1252  
 1253  
 1254  
 1255  
 1256  
 1257  
 1258  
 1259  
 1260  
 1261  
 1262  
 1263  
 1264  
 1265  
 1266  
 1267  
 1268  
 1269  
 1270  
 1271  
 1272  
 1273  
 1274  
 1275  
 1276  
 1277  
 1278  
 1279  
 1280  
 1281  
 1282  
 1283  
 1284  
 1285  
 1286  
 1287  
 1288  
 1289  
 1290  
 1291  
 1292  
 1293  
 1294  
 1295  
 1296  
 1297  
 1298  
 1299  
 1300  
 1301  
 1302

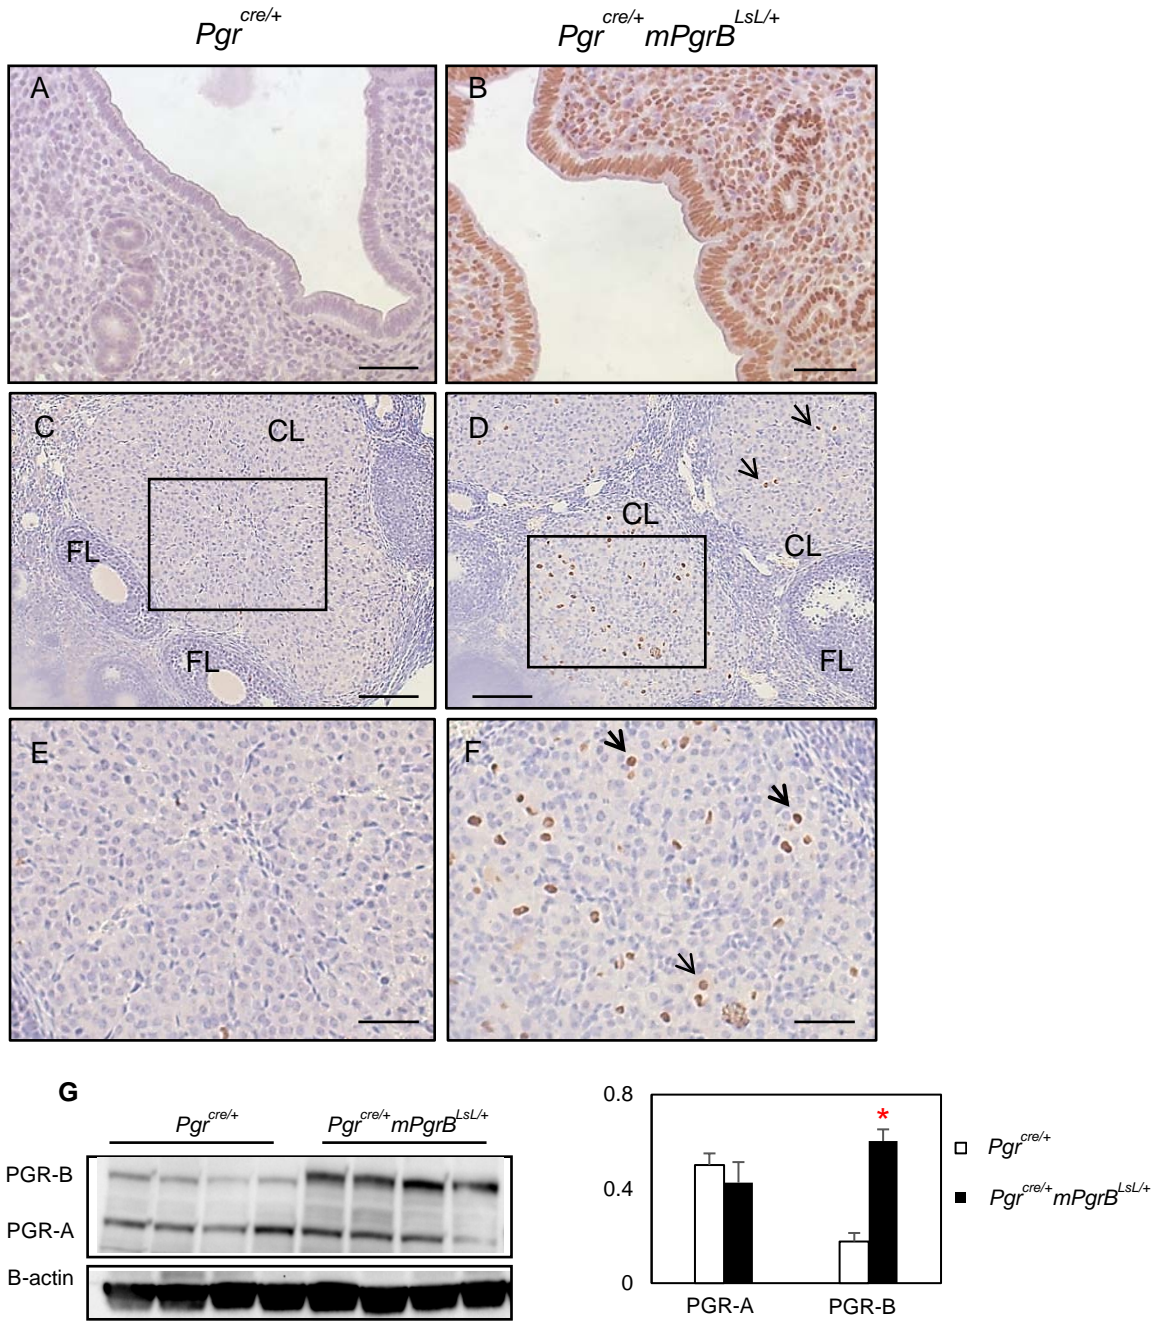

Supplemental Figure 1: Levels of the conditional overexpression allele for *mPgrB* in uterine and ovarian tissue. (A-D) Myc-tag immunohistochemistry of 8-week-old wildtype uterus (A) and ovary (C) compared to  $Pgr^{cre/+} mPgrB^{LsL/+}$  mouse uterus (B) and ovary (D). (E-F) High magnification images of corpora lutea from insets in (C-D) in wildtype ovary (E) and  $Pgr^{cre/+} mPgrB^{LsL/+}$  ovary (F). (G) Western blot and the associated quantification of PGR levels from whole uterine isolates in wildtype  $Pgr^{cre/+}$  and  $Pgr^{cre/+} mPgrB^{LsL/+}$  mice. PGRB protein (118 kDa), PGRA protein (90 kDa). C-D 100  $\mu$ M scale bar, A-B, E-F 50  $\mu$ M scale bar. n=2-4 mice for immunohistochemistry. Each band of the western blot indicates one mouse. Student's t-test used to compare groups. \* $p < 0.05$  compared to  $Pgr^{cre/+}$ . Scale bar means SEM.

1303  
1304  
1305  
1306  
1307  
1308  
1309  
1310  
1311  
1312  
1313  
1314  
1315  
1316  
1317  
1318  
1319  
1320  
1321  
1322  
1323  
1324  
1325  
1326  
1327  
1328  
1329  
1330  
1331  
1332  
1333  
1334  
1335  
1336  
1337  
1338  
1339  
1340  
1341  
1342  
1343  
1344  
1345  
1346  
1347  
1348  
1349  
1350  
1351  
1352  
1353

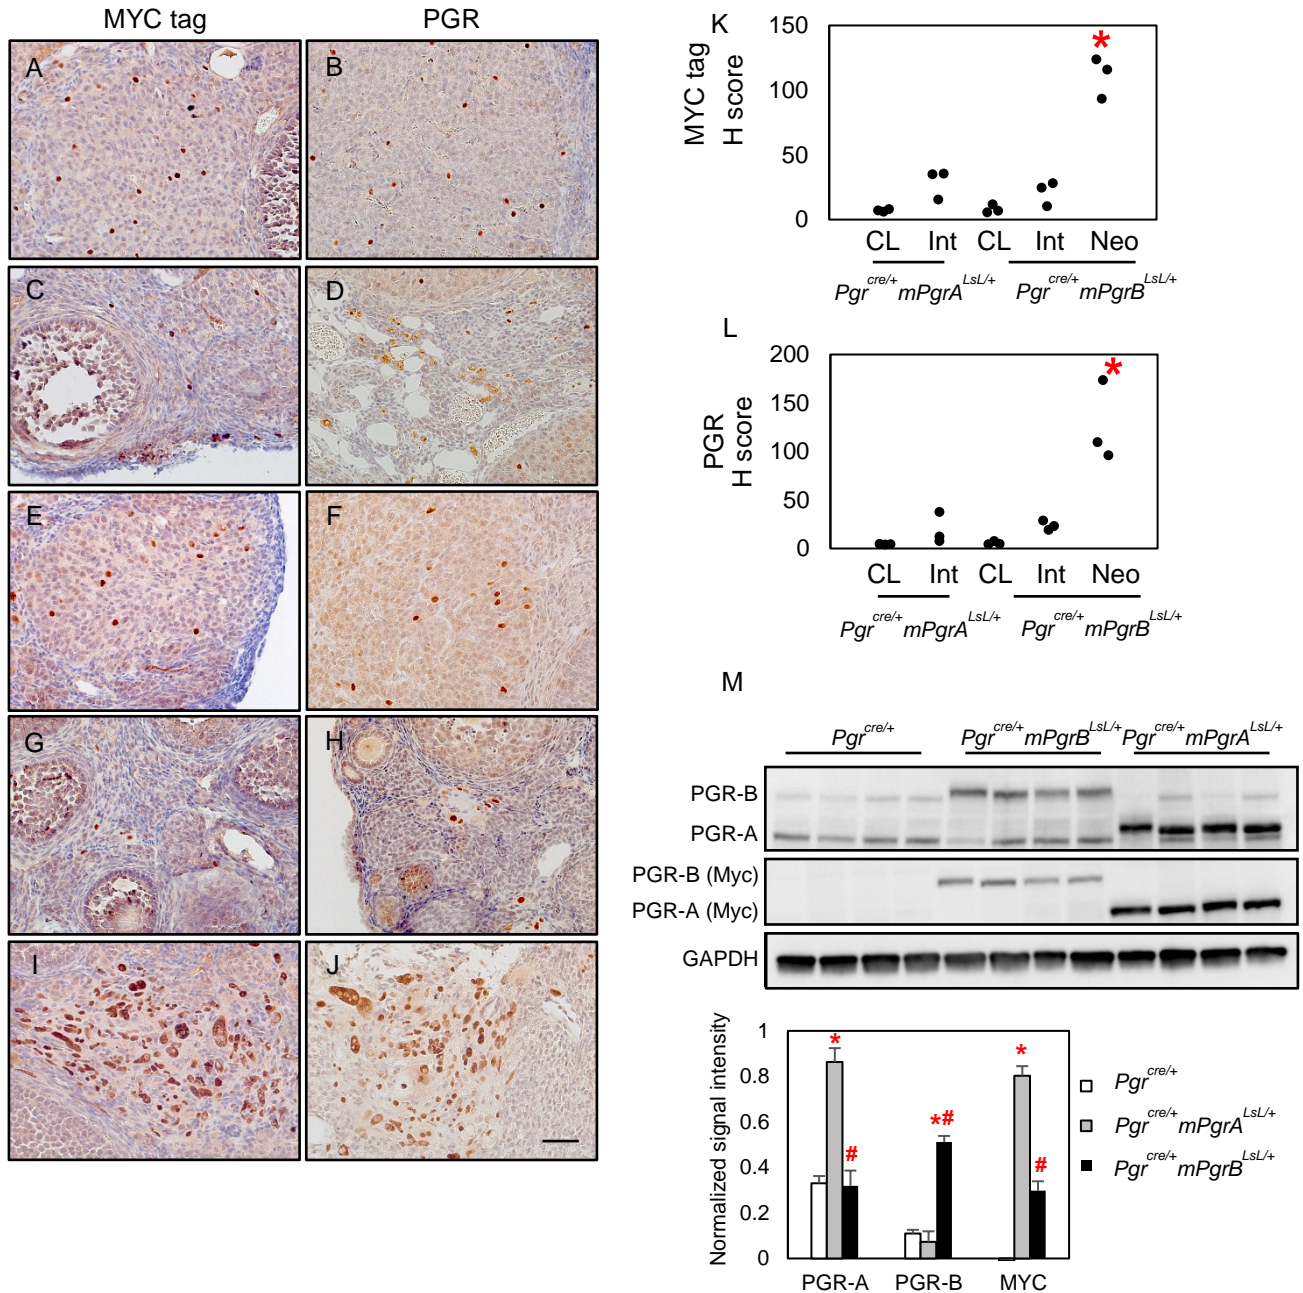

Supplemental Figure 2: PGR transgene levels are comparable in both *Pgr<sup>cre/+</sup>mPgrA<sup>LsL/+</sup>* and *Pgr<sup>cre/+</sup>mPgrB<sup>LsL/+</sup>* mice at 13 weeks of age. Immunohistochemistry showed MYC tag staining (A, C, E, G, I) and PGR (B, D, F, H, J) in the CL (A, B) and Int (C, D) of *Pgr<sup>cre/+</sup>mPgrA<sup>LsL/+</sup>* ovary (A-D), the CL (E, F) and Int (G, H), and Neoplastic tumor (I, J) of *Pgr<sup>cre/+</sup>mPgrB<sup>LsL/+</sup>* ovary (E-J). n=3 mice. \*p<0.05. CL: Corpus luteum; Int: Interstitial tissues; Neo: 23 week neoplastic stage tumor. H score indices for MYC tag (K) and PGR (L) immunohistochemistry. Western blot of PGR and MYC tag and the associated quantification in whole uterine isolates (M). One-way ANOVA with post hoc Tukey's test was used to compare groups. \*p<0.05 compared with *Pgr<sup>cre/+</sup>* mice. #p<0.05 compared with *Pgr<sup>cre/+</sup>mPgrA<sup>LsL/+</sup>* mice. 50  $\mu$ M scale bar. n=3 mice for immunohistochemistry. n=4 mice for western blot. Scale bar means SEM.

1354  
1355  
1356  
1357  
1358  
1359  
1360  
1361  
1362  
1363  
1364  
1365  
1366  
1367  
1368  
1369  
1370  
1371  
1372  
1373  
1374  
1375  
1376  
1377  
1378  
1379  
1380  
1381  
1382  
1383  
1384  
1385  
1386  
1387  
1388  
1389  
1390  
1391  
1392  
1393  
1394  
1395  
1396  
1397  
1398  
1399  
1400  
1401  
1402  
1403  
1404

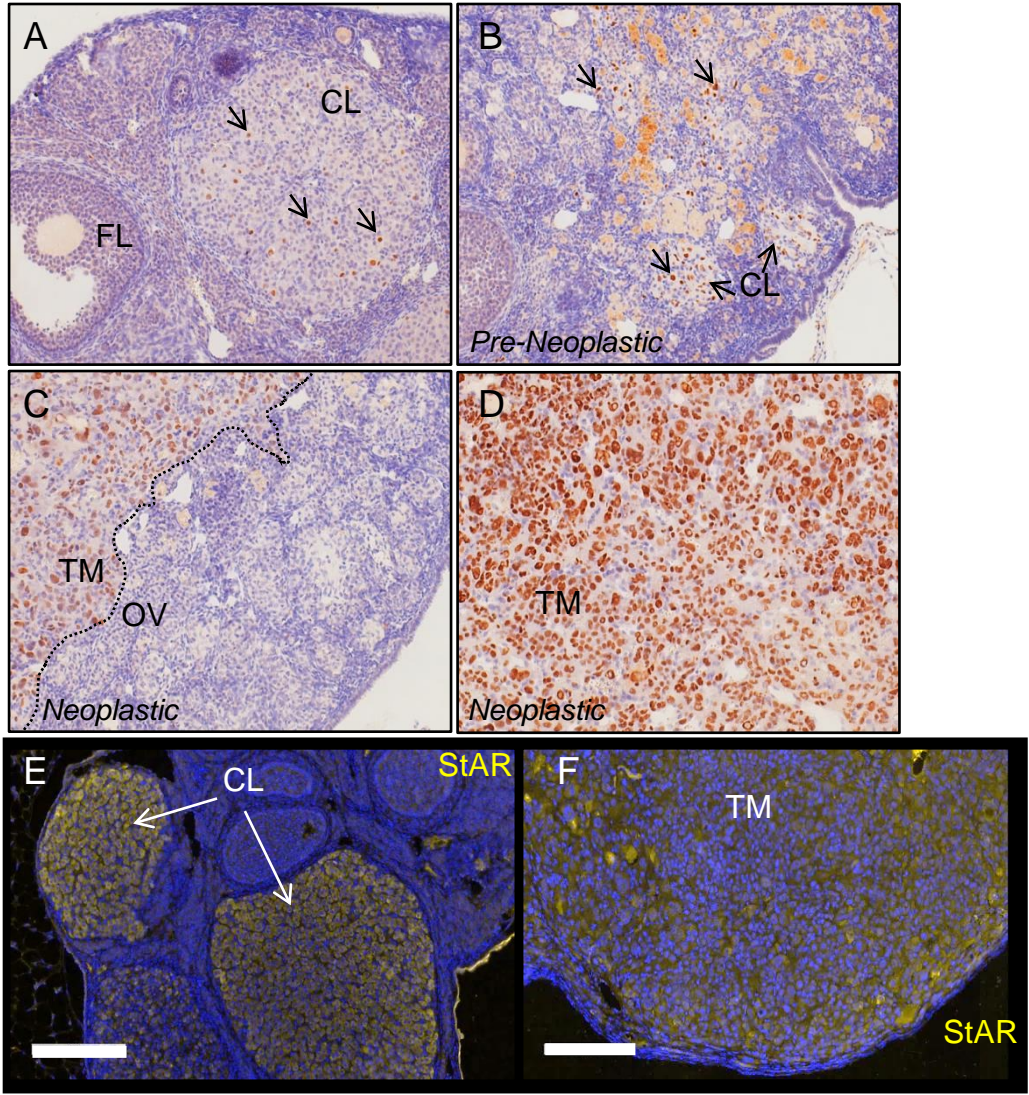

Supplemental Figure 3: PGR positive ovarian neoplasia from *Pgr<sup>cre/+</sup>mPgrB<sup>LsL/+</sup>* mice consume the entire ovarian bursa and exhibit robust StAR expression levels. Immunohistochemical images of PGR positive cells within corpora lutea (indicated by arrows) from normal *Pgr<sup>cre/+</sup>mPgrB<sup>LsL/+</sup>* mouse ovaries at 10 weeks (A) and from pre-neoplastic ovaries (B). (C-D) PGR immunohistochemistry of PGR positive outgrowth of cells occurring in neoplastic ovaries from *Pgr<sup>cre/+</sup>mPgrB<sup>LsL/+</sup>* mice. Immunofluorescent staining for steroidogenic acute regulatory protein (StAR) in a wildtype ovary (E) and neoplastic ovarian tumor (F) of *Pgr<sup>cre/+</sup>mPgrB<sup>LsL/+</sup>* mice. Blue staining is DAPI, yellow staining represents positive StAR staining. 100  $\mu$ M scale bar for A-D. 200  $\mu$ M scale bar for E-F. FL=follicle, CL=corpora lutea, OV=ovary, TM=tumor tissue. n=4 mice for A-B images. C-D are representative of individual mouse tumor burden over time. n=3 mice for E-F images.

*Pgr<sup>cre/+</sup> Rosa<sup>mT/mG</sup>*

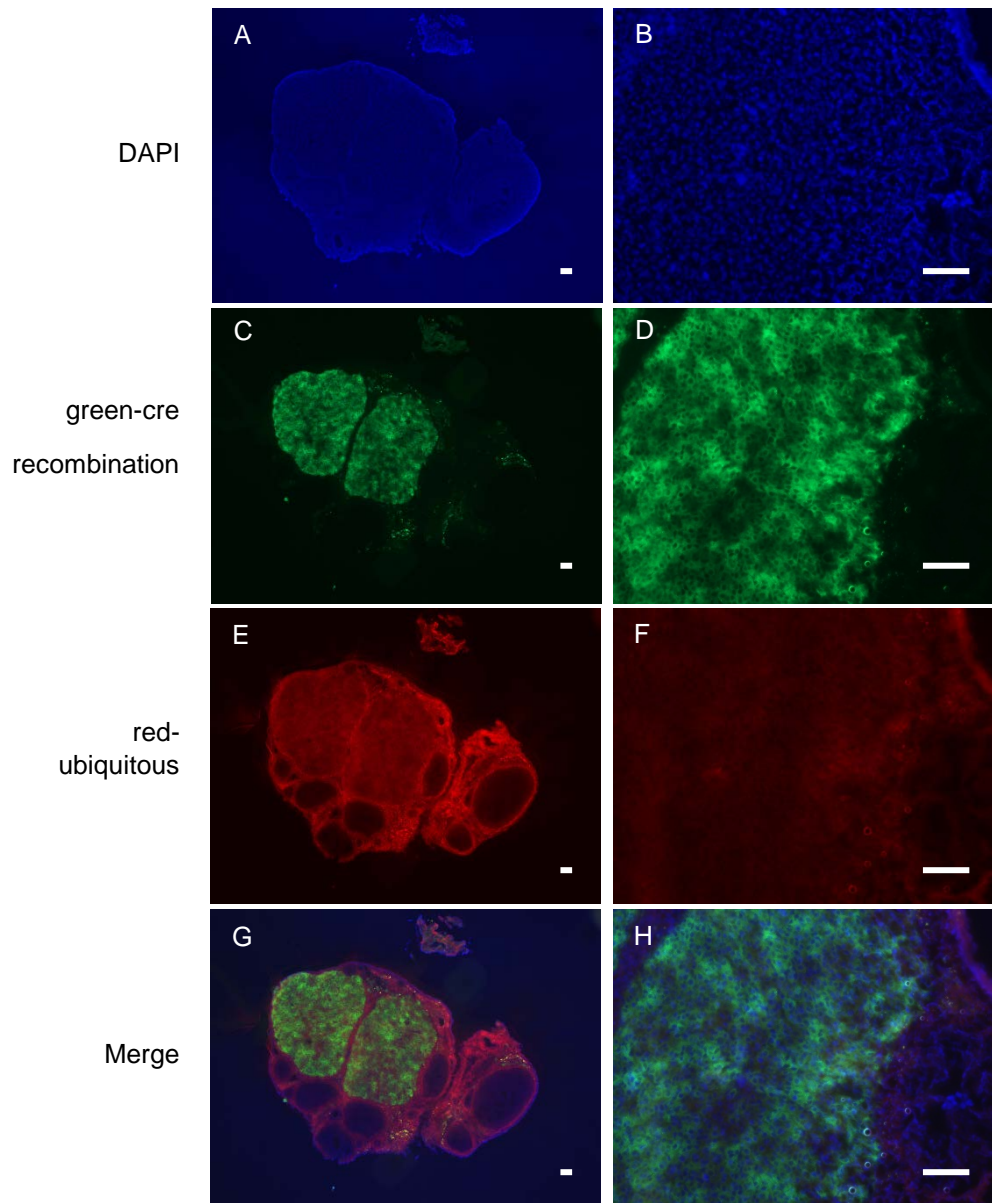

Supplemental Figure 4: Lineage tracing using the *Pgr<sup>cre/+</sup> Rosa<sup>mT/mG</sup>* model demonstrates localized Cre recombination to the corpus luteum at 8 weeks of age. DAPI (A, B), positive Cre recombinase activity in green from the *Rosa<sup>mT/mG</sup>* construct (C, D), ubiquitous red fluorescence from *Rosa<sup>mT/mG</sup>* model (E, F), and red-green overlay (G, H). *Pgr<sup>cre/+</sup> Rosa<sup>mT/mG</sup>* mouse ovary (A, C, E, G) and ovarian corpus luteum (B, D, F, H). 100  $\mu$ M scale bar. n=3 mice.

1456

1457

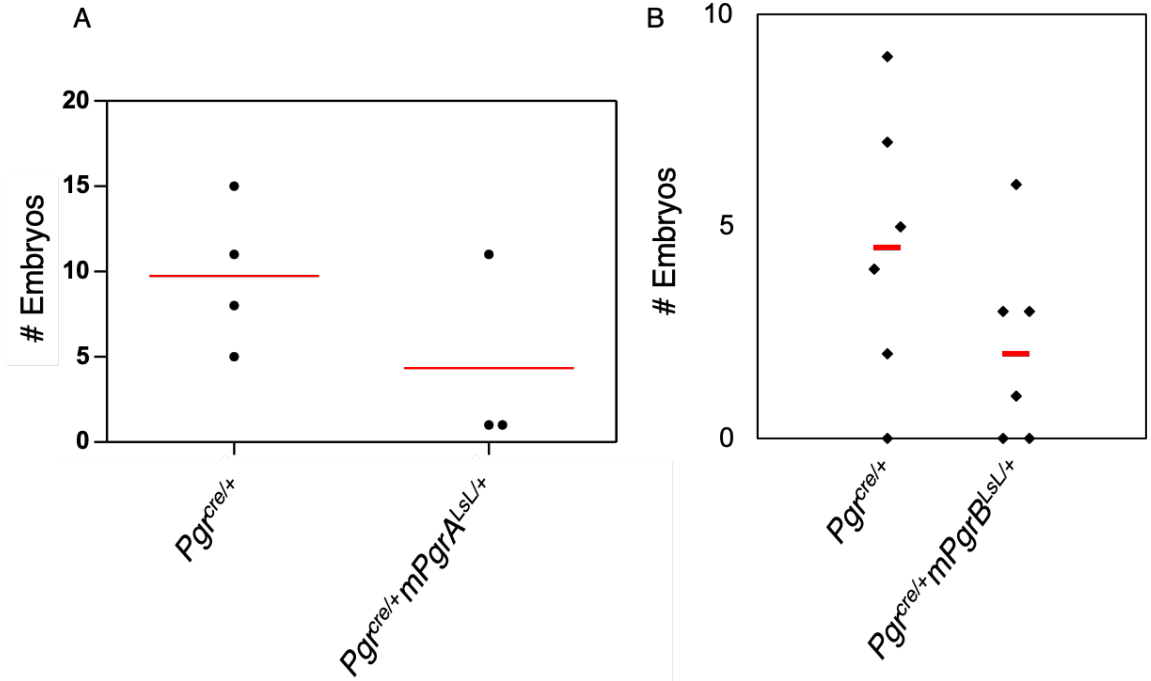

1458

1459

1460

1461

1462

1463

1464

1465

1466

1467

1468

1469

1470

1471

1472

1473

1474

1475

1476

1477

1478

1479

1480

1481

1482

1483

1484  
 1485  
 1486  
 1487  
 1488  
 1489  
 1490  
 1491  
 1492  
 1493  
 1494  
 1495  
 1496  
 1497  
 1498  
 1499  
 1500  
 1501  
 1502  
 1503  
 1504  
 1505  
 1506  
 1507  
 1508  
 1509  
 1510  
 1511  
 1512  
 1513  
 1514  
 1515  
 1516  
 1517  
 1518  
 1519  
 1520  
 1521  
 1522  
 1523  
 1524  
 1525  
 1526  
 1527  
 1528  
 1529  
 1530  
 1531

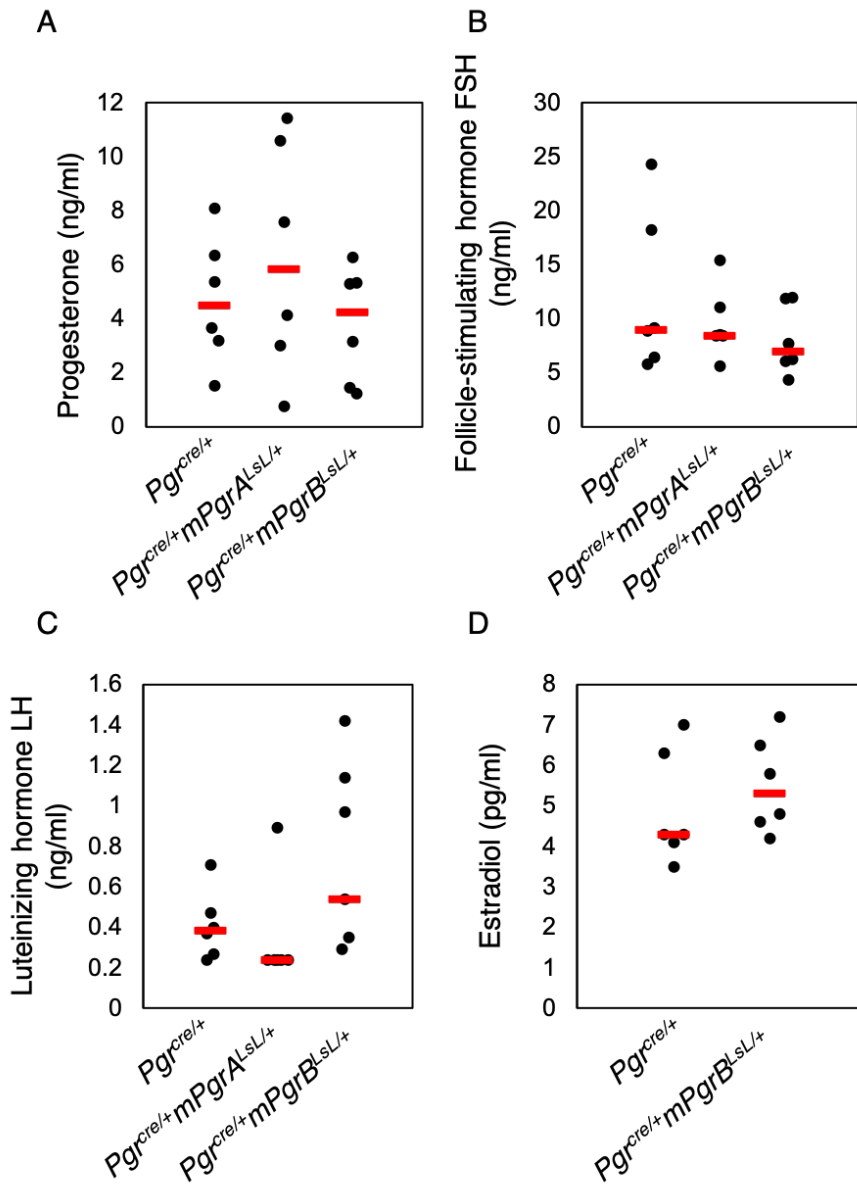

Supplemental Figure 6: Increased ovarian PGR expression does not impair endogenous hormone levels. Serum levels of progesterone (A), follicle-stimulating hormone (FSH) (B), and luteinizing hormone (LH) (C) from 23 week-old *Pgr<sup>cre/+</sup> mPgrA<sup>LsL/+</sup>* mice and *Pgr<sup>cre/+</sup> mPgrB<sup>LsL/+</sup>* mice at diestrous stage. (D) Serum estradiol levels for *Pgr<sup>cre/+</sup>* and *Pgr<sup>cre/+</sup> mPgrB<sup>LsL/+</sup>* mice. Each dot indicates the serum level from one mouse. The red line indicates median level. n=6 mice. One-way ANOVA with post-hoc Tukey's test was used for progesterone, FSH, and LH analyses. Student's t-test was utilized to compare estradiol levels.

1532  
1533  
1534  
1535  
1536  
1537  
1538  
1539  
1540  
1541  
1542  
1543  
1544  
1545  
1546  
1547  
1548  
1549  
1550  
1551  
1552  
1553  
1554  
1555  
1556  
1557  
1558  
1559  
1560  
1561  
1562  
1563  
1564  
1565  
1566  
1567  
1568  
1569  
1570  
1571  
1572  
1573  
1574  
1575  
1576  
1577  
1578  
1579  
1580

A

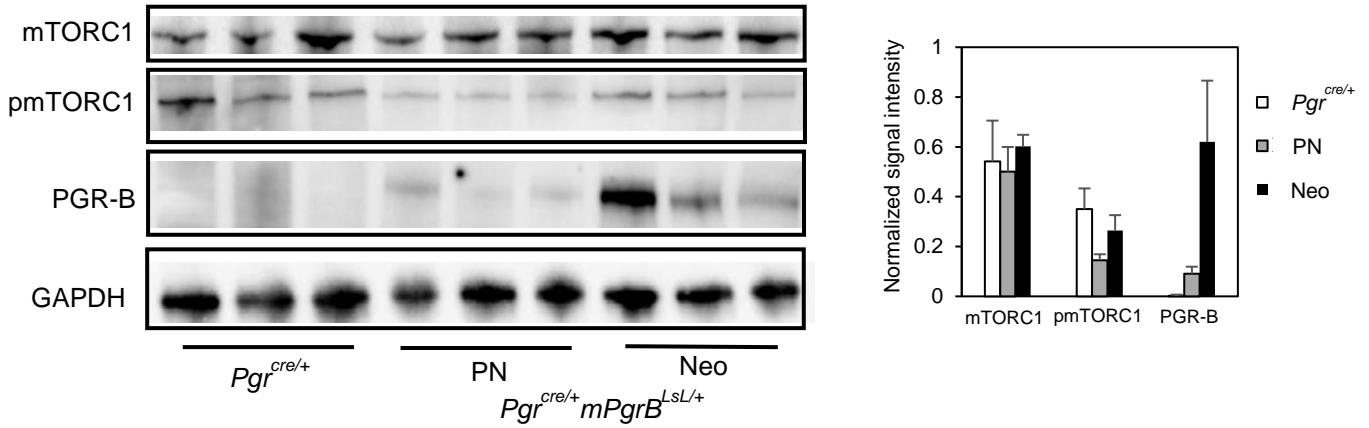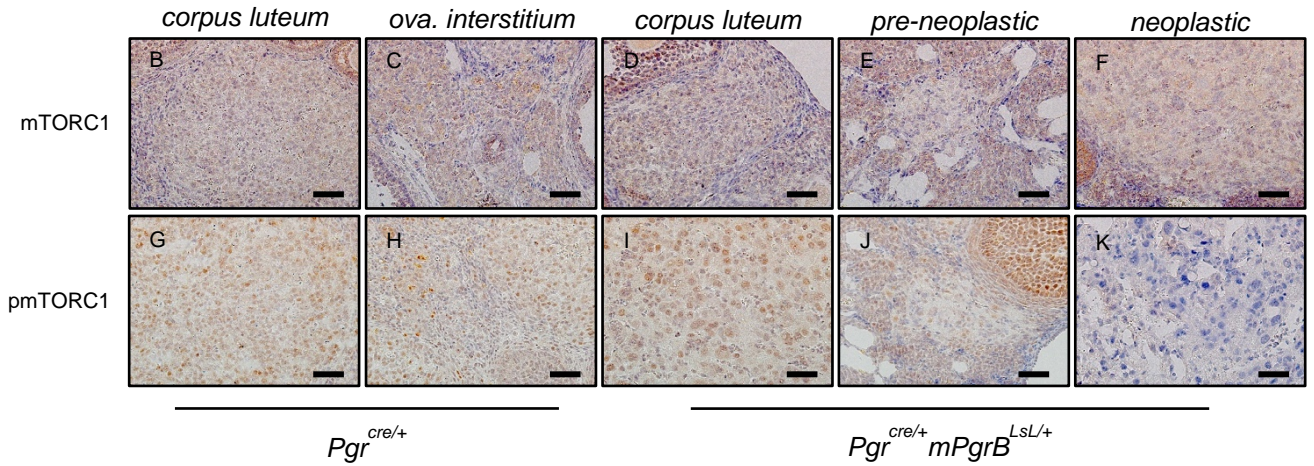

Supplemental Figure 7: Phosphorylated mTORC1 protein levels are slightly reduced in neoplasia of the *Pgr<sup>cre/+</sup> mPgrB<sup>LsL/+</sup>* ovary. Western blot of mTORC1, pmTORC1, PGRB and GAPDH in the *Pgr<sup>cre/+</sup>*, and *Pgr<sup>cre/+</sup> mPgrB<sup>LsL/+</sup>* ovaries at different stages with the associated quantification (A). Immunohistochemistry of mTORC1 (B-F) and pmTORC1 (G-K) staining in the corpus luteum (B, G) and ovarian interstitium (C, H) of the *Pgr<sup>cre/+</sup>* ovary (B, C, G, H), the corpus luteum (D, I), pre-neoplastic (E, J), and neoplastic tumor (F, K) of *Pgr<sup>cre/+</sup> mPgrB<sup>LsL/+</sup>* ovary (D-F, I-K). 50 μm scale bar. n=3 mice. Scale bar means SEM. One-way ANOVA with post-hoc Tukey's test used to determine significance.

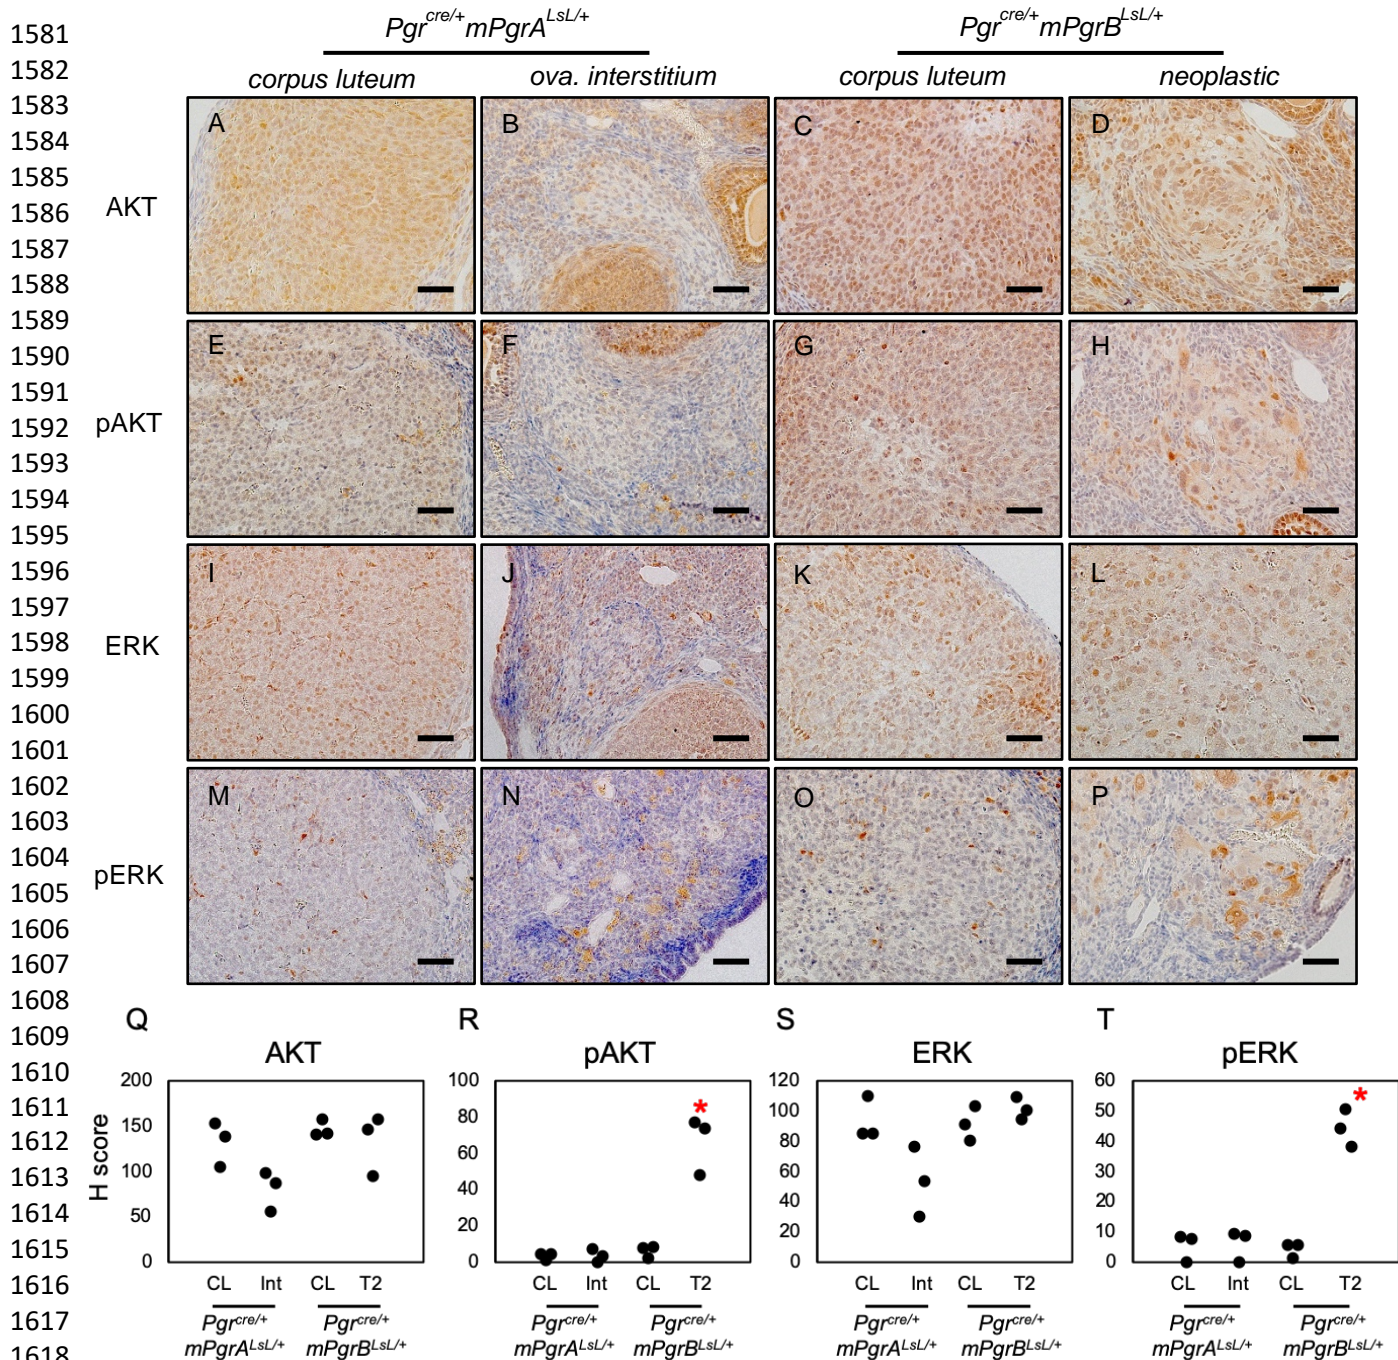

1620 Supplemental Figure 8: pAKT and pERK expression in the  $Pgr^{cre/+} mPgrA^{LsL/+}$  ovaries were comparable  
 1621 to the corpus luteum of  $Pgr^{cre/+} mPgrB^{LsL/+}$  ovary, but much lower than the tumor tissues of  
 1622  $Pgr^{cre/+} mPgrB^{LsL/+}$  ovary at 23 weeks neoplastic. Immunohistochemistry showed AKT (A-D), pAKT (E-  
 1623 H), ERK (I-L) and pERK (M-P) in the CL (A, E, I, M) and Int (B, F, J, N) of  $Pgr^{cre/+} mPgrA^{LsL/+}$  ovary  
 1624 compared to CL (C, G, K O) and neoplastic ovary (D, H L P) of  $Pgr^{cre/+} mPgrB^{LsL/+}$  mice. H score of AKT  
 1625 (Q), pAKT (R), ERK (S) and pERK (T). n=3 mice. CL: Corpus luteum; Int: Interstitial tissues; T2:  
 1626 neoplastic (23wks). One-way ANOVA with post-hoc Tukey's test for significance. \*p<0.05 compared to  
 1627 CL. 50  $\mu$ M scale bar.  
 1628



1629  
1630  
1631  
1632  
1633  
1634  
1635  
1636  
1637  
1638  
1639  
1640  
1641  
1642  
1643  
1644  
1645  
1646  
1647  
1648  
1649  
1650  
1651  
1652  
1653  
1654  
1655  
1656  
1657  
1658  
1659  
1660  
1661  
1662  
1663  
1664  
1665  
1666  
1667  
1668  
1669  
1670  
1671  
1672  
1673  
1674  
1675  
1676

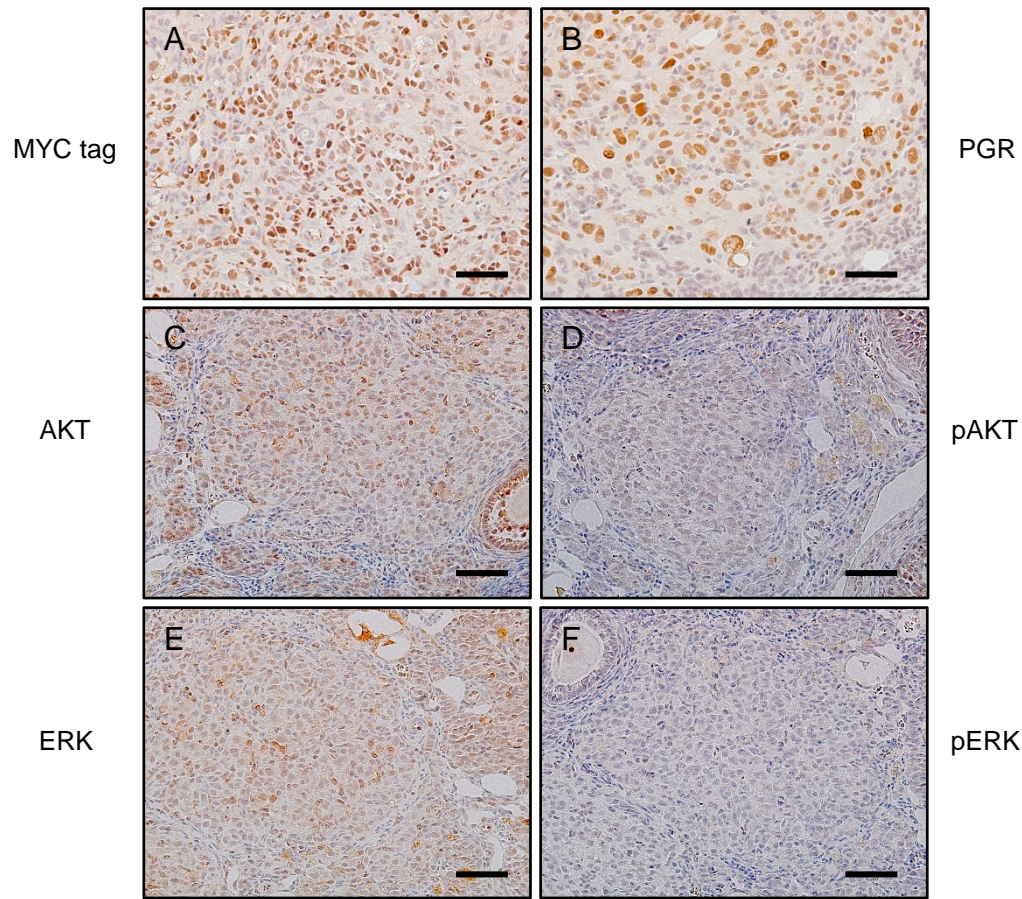

Supplemental Figure 9: pAKT and pERK were not activated in the *Pgr<sup>cre/+</sup>mPgrA<sup>LSL/+</sup>* ovaries with neoplasia. Immunohistochemistry of MYC tagged PGRA (A), PGR (B), AKT (C), pAKT (D), ERK (E) and pERK (F) in the *Pgr<sup>cre/+</sup>mPgrA<sup>LSL/+</sup>* ovary. n=1 mouse. 50  $\mu$ M scale bar.

1677  
 1678  
 1679  
 1680  
 1681  
 1682  
 1683  
 1684  
 1685  
 1686  
 1687  
 1688  
 1689  
 1690  
 1691  
 1692  
 1693  
 1694  
 1695  
 1696  
 1697  
 1698  
 1699  
 1700  
 1701  
 1702  
 1703  
 1704  
 1705  
 1706  
 1707  
 1708  
 1709  
 1710  
 1711  
 1712  
 1713  
 1714  
 1715  
 1716  
 1717

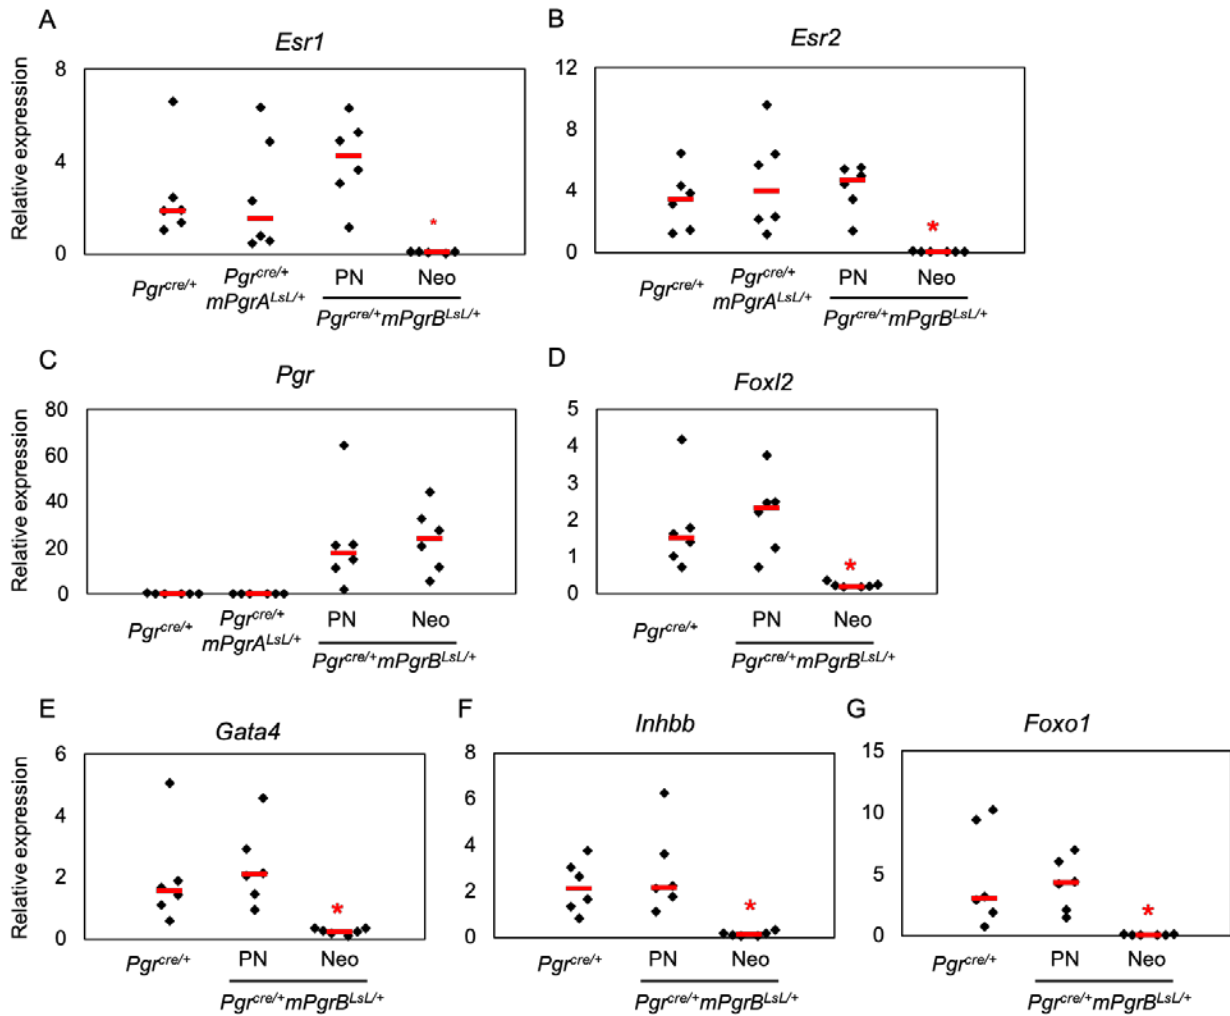

Supplemental Figure 10: Message levels of estrogen and progesterone receptors and granulosa cell markers decrease in advanced PGR-driven neoplasia. Relative message levels for (A) *Esr1*, (B) *Esr2*, (C) *Pgr*, and granulosa cell markers (D) *Foxl2*, (E) *Gata4*, (F) *Inhbb*, and (G) *Foxo1* in  $Pgr^{cre/+}$  control ovarian tissue compared to  $Pgr^{cre/+}mPgrA^{LsL/+}$  ovaries and  $Pgr^{cre/+}mPgrB^{LsL/+}$  pre-neoplastic (PN) and neoplastic (Neo) ovarian tissue. One-way ANOVA with post-hoc Tukey's test used to compare groups. \* $p < 0.05$  compared to  $Pgr^{cre/+}$ . n=6 mice.

1718

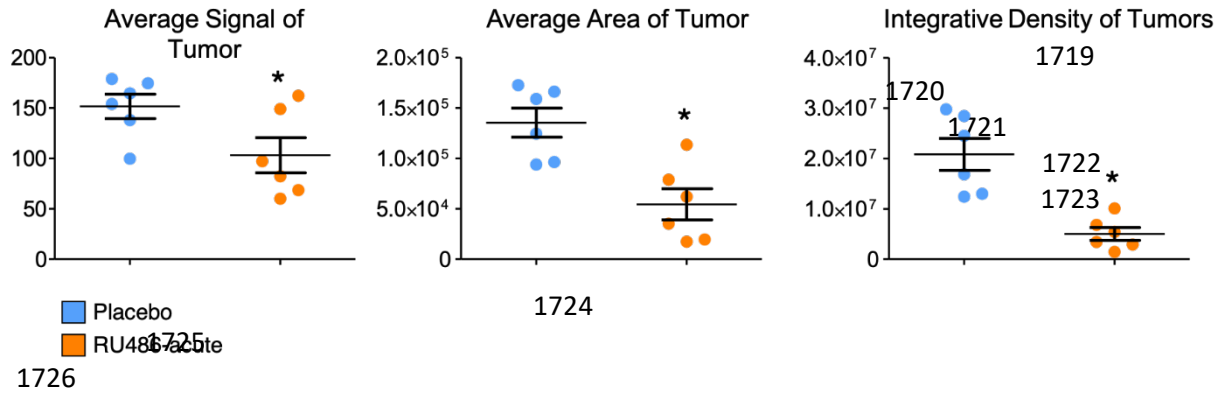

1727

1728 Supplemental Figure 11: *Pgr<sup>cre/+</sup>mPgrB<sup>LsL/+</sup>* tumors exhibit decreased density and size after acute RU486  
1729 treatment. (A-C) ImageJ analysis on tumor frames exhibiting the greatest tumor diameter taken from the  
1730 final week of treatment. (A) Reports average signal output or lightened areas in tumor images in RU486  
1731 vs placebo groups. (B) Depicts average areas of tumor as a function of the measurement tool used in the  
1732 ImageJ software platform of RU486 versus placebo treated tumors. (C) Average integrative density (cell  
1733 signal multiplied by cell area) for the ultrasound frames from RU486 versus placebo treated  
1734 *Pgr<sup>cre/+</sup>mPgrB<sup>LsL/+</sup>* ovarian tumors. Student's t-test utilized to determine significance. \*p<0.05. Error bars  
1735 represent ±SEM. n=6 mice.

1736

1737

1738

1739

1740

1741

1742

1743

1744

1745

1746

1747

1748

1749

1750

1751

1752

1753

1754

1755

1756

1757

1758

1759

1760

1761

1762

1763  
 1764  
 1765  
 1766  
 1767  
 1768  
 1769  
 1770  
 1771  
 1772  
 1773  
 1774  
 1775  
 1776  
 1777  
 1778  
 1779  
 1780  
 1781  
 1782  
 1783  
 1784  
 1785  
 1786  
 1787  
 1788  
 1789  
 1790  
 1791  
 1792  
 1793  
 1794  
 1795  
 1796  
 1797  
 1798  
 1799  
 1800  
 1801  
 1802  
 1803  
 1804  
 1805  
 1806  
 1807  
 1808  
 1809  
 1810

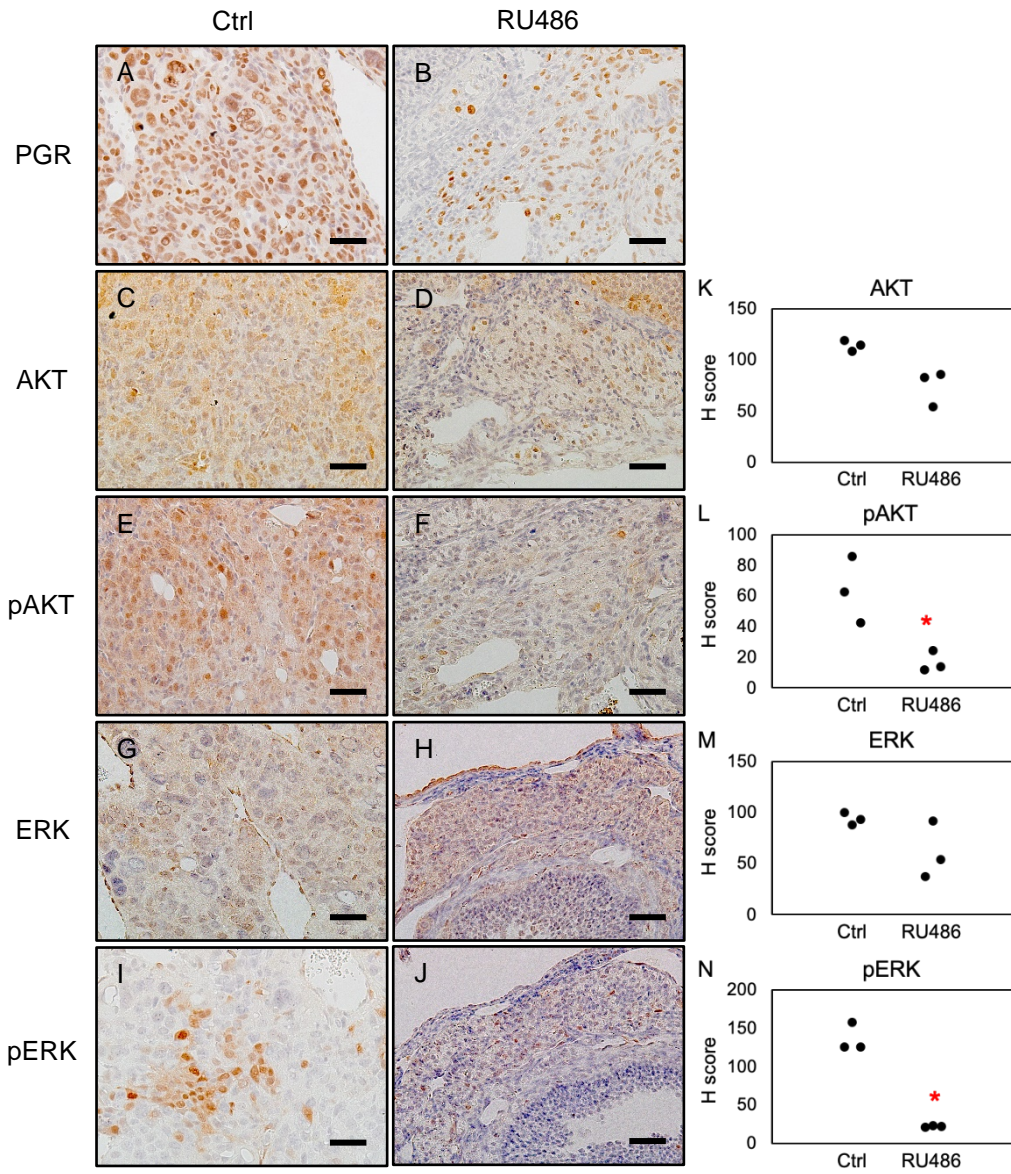

Supplemental Figure 12: Chronic RU486 treatment suppresses pAKT and pERK levels in the *Pgr<sup>cre/+</sup>mPgrB<sup>LsL/+</sup>* ovarian tumor tissue. Immunohistochemistry of PGR (A, B), AKT (C, D), pAKT (E, F), ERK (G, H), and pERK (I, J) in the control (Ctrl) (A, C, E, G, I) and RU486 treated (B, D, F, H, J) *Pgr<sup>cre/+</sup>mPgrB<sup>LsL/+</sup>* ovaries. H score of AKT (K), pAKT (L), ERK (M), and pERK (N). Ctrl: age comparable *Pgr<sup>cre/+</sup>mPgrB<sup>LsL/+</sup>* ovaries without treatment. RU486: RU486 pellet treated. n=3 mice. Student's t-test used to compare groups. \*p<0.05. 50 μm scale bar.

1811

A

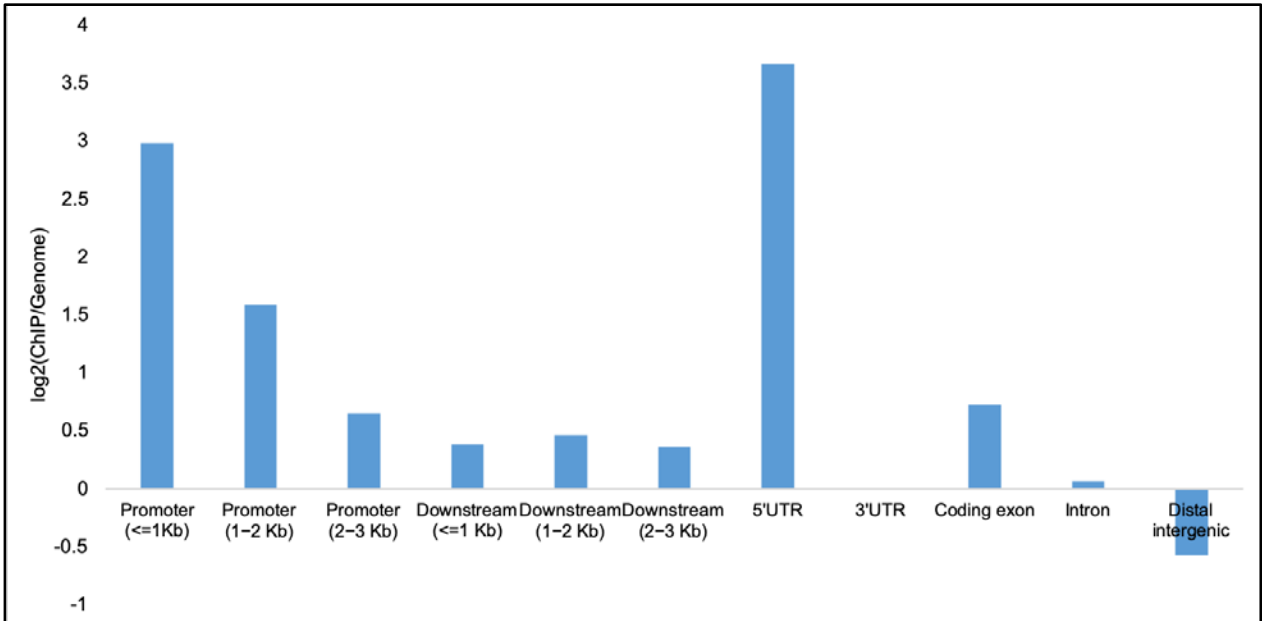

1812

B

|   |  |                  | 1813 |
|---|--|------------------|------|
| 1 |  | Nuclear Receptor | 1814 |
| 2 |  | ATF/JUN          | 1816 |
| 3 |  | GATA             | 1818 |
| 4 |  | CEBP             | 1820 |
| 5 |  | HNF1             | 1822 |
| 6 |  | ETS              | 1824 |
| 7 |  | STAT             | 1826 |
| 8 |  | RUNX             | 1828 |
| 9 |  | SP1/KLF          | 1830 |

1832

1833

1834

1835

1836

1837

1838

Supplemental Figure 13: PGR ChIP-seq is enriched at promoter regions and binds to hormone receptor binding sequences. (A) Enrichment distribution of PGR binding on the genome compared to normal expected enrichment. Data is equivalent to the natural log of PGR chip binding/basal genome binding. (B) Top binding of known motifs by PGR in the ovarian tumor ChIP-Seq.

1839  
 1840  
 1841  
 1842  
 1843  
 1844  
 1845  
 1846  
 1847  
 1848  
 1849  
 1850  
 1851

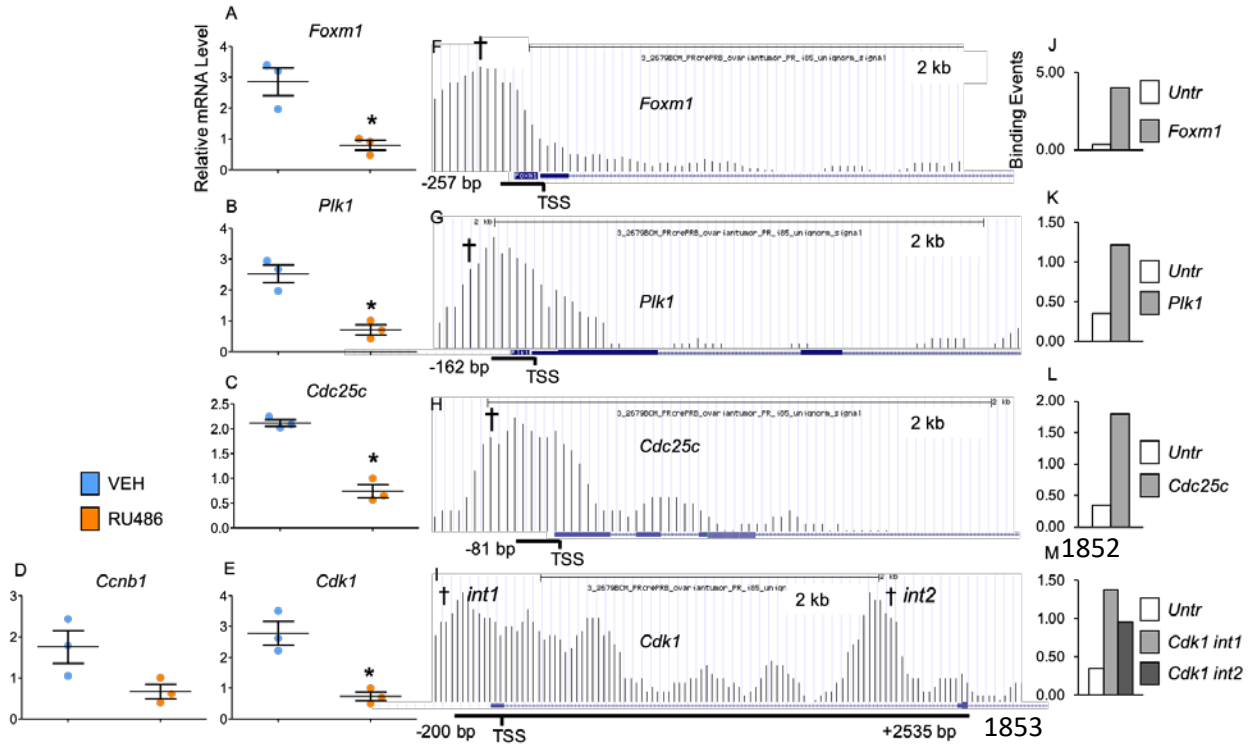

1854  
 1855  
 1856  
 1857  
 1858  
 1859  
 1860  
 1861  
 1862  
 1863  
 1864  
 1865  
 1866  
 1867  
 1868  
 1869  
 1870  
 1871  
 1872  
 1873  
 1874  
 1875  
 1876  
 1877  
 1878

Supplemental Figure 14: PGRB promotes the cell cycle through direct regulation of genes necessary for the G2/M transition. Relative message levels for (A) *Foxm1*, (B) *Plk1*, (C) *Cdc25c*, (D) *Ccnb1*, and (E) *Cdk1*. (F-I) Graphical description of the PGR binding events for (F) *Foxm1*, (G) *Plk1*, (H) *Cdc25c*, and (I) *Cdk1* with validated binding intervals indicated by † and distances reported from transcription start site (TSS). (J-M) ChIP-qPCR validation results of binding events indicated with † described in (F-I) for *Foxm1* (J), *Plk1* (K), *Cdc25c* (L), and *Cdk1* (M). Y-axis represents the number of binding events detected per 1000 cells in the untranslated region versus interval of interest. Error bars indicate the standard deviation of averaged binding occurrences. Student's t-test was used to determine significance. \*denotes significance with a p-value ≤ 0.05.

1879  
1880  
1881  
1882  
1883  
1884  
1885  
1886  
1887  
1888

| Age      | Unilateral | Bilateral |
|----------|------------|-----------|
| 23 weeks | 2          | 0         |
| 28 weeks | 4          | 2         |
| 33 weeks | 7          | 1         |

Supplemental Table 1: Bilateral and unilateral tumors occur in *Pgr<sup>cre/+</sup>mPgrB<sup>LsL/+</sup>* mice. n=16 mice.

1889  
1890  
1891  
1892  
1893  
1894  
1895  
1896  
1897  
1898  
1899  
1900  
1901  
1902  
1903  
1904  
1905  
1906  
1907  
1908  
1909  
1910  
1911  
1912  
1913  
1914  
1915  
1916  
1917  
1918  
1919  
1920  
1921  
1922  
1923  
1924

1925

| Ingenuity Canonical Pathways      | -log(p-value) | z-score | Molecules                                                                                                                                                                                                                                      |
|-----------------------------------|---------------|---------|------------------------------------------------------------------------------------------------------------------------------------------------------------------------------------------------------------------------------------------------|
| Acute Phase Response Signaling    | 3.3           | 2.694   | MAP2K6,IL6ST, FN1,APOH,PIK3R1,HRAS,SERPINA3,CP,FGG,MBL2,JUN,NFKBIA,ITIH4,RBP2,MRAS,AKT3, FGB,OSMR,LBP,TNFRSF1B,IL1RAP,C3,RRAS,IL6R,SERPINF1,MAPK8,C5,FOS,IL18,HP,APOA1,RRAS2,TF,PTPN11,CRP,PIK3CB,FGA,A2M                                      |
| IL-8 Signaling                    | 6.12          | 1.697   | PRKD1,RND2,RRAS,FGFR1,RAC1,HBEGF,FGFR2,MMP2,MYL9,BCL2L1,ARRB2,CCND2,RHOQ,PTPN11,IRS1,PIK3R6,MAPK10,ANGPT2,PTK2B,PDGFC,EIF4EBP1,BCL2,JUN,KL,AKT3,FLT1,RHOC,MAPK8,IRAK3,CSTB,PLD4,ITGB2,FOS,RRAS2,PIK3CB,KDR,IRAK4,PRKCB                         |
| PI3K/AKT Signaling                | 1.28          | 2.236   | TSC1,GAB2,JAK1,YWHAH,RRAS,PPP2R2A,PIK3R1,HRAS,MDM2,CCND1,EIF4EBP1,BCL2,BCL2L1,RRAS2,NFKBIA,FOXO1,PPM1L,MRAS,AKT3,PIK3CB,GSK3B,ITGA4,THEM4                                                                                                      |
| CXCR4 Signaling                   | 5.35          | 1.441   | PIK3R1,HRAS,GNA14,BCAR1,FGFR3,GNB1,ROCK2,JUN,RHOB,KL,ADCY5,MRAS,AKT3,PRKD1,GNG12,RND2,ADCY2,PAK6,RRAS,RHOC,CXCR4,MYL9,FGFR1,RAC1,ADCY6,MAPK8,FGFR2,ITPR1,MYL9,ADCY9,FOS,RRAS2,RHOQ,PAK3,PTPN11,IRS1,ITPR3,LYN,MAPK10,PIK3R6,PIK3CB,ELMO1,PRKCB |
| Cyclins and Cell Cycle Regulation | 2.22          | 1.604   | CCNE2,HDAC4,HDAC2,HDAC8,PPP2R2A,WEE1,CCND1,CDK1,SKP2,E2F6,CCNE1,CDKN2D,CCND2,PPM1L,E2F7,E2F5,TGFB2,GSK3B,E2F8                                                                                                                                  |
| Macropinocytosis Signaling        | 4.68          | 1.606   | RRAS,PDGFA,FGFR1,PIK3R1,RAC1,HRAS,FGFR2,RAB34,PDGFC,CSF1R,ITGB3,FGFR3,ITGB2,RRAS2,PTPN11,CSF1,KL,IRS1,PIK3R6,MRAS,CD14,PIK3CB,PDGFD,PRKD1,PRKCB                                                                                                |
| Ephrin Receptor Signaling         | 2.49          | 1.177   | RAP1B,FYN,RAPGEF1,ITSN1,PDGFA,PTPN13,HRAS,EPHA4,LIMK2,GNA14,BCAR1,PDGFC,GRINA,ROCK2,GNB1,EPHB6,VEGFA,EFNB2,EFNA5,MRAS,AKT3,GNG12,ITGA4,GRIN2B,NGEF,PAK6,RRAS,CXCR4,ARHGEF15,CREBBP,RAC1,ATF2,RRAS2,PTPN11,PAK3,PDGFD                           |

1926

1927

1928 Supplemental Table 2: Canonical pathways are altered in 23-week-old neoplastic *Pgr<sup>cre/+</sup>mPgrB<sup>LsL/+</sup>*  
 1929 mouse ovaries. Ingenuity Pathway Analysis was utilized to obtain the list of top canonical pathways from  
 1930 the RNA microarray performed on 23-week-old, neoplastic *Pgr<sup>cre/+</sup>mPgrB<sup>LsL/+</sup>* mouse ovarian tumor  
 1931 tissue.

1932

1933

1934

1935

1936

1937

1938

1939

1940

1941

1942

1943

1944

1945

1946

1947

1948

1949

1950

1951

1952

1953

1954

1955



1956

| Ingenuity Canonical Pathways                  | -log(p-value) | Ratio    | Molecules                                                                                         |
|-----------------------------------------------|---------------|----------|---------------------------------------------------------------------------------------------------|
| Mitotic Roles of Polo-Like Kinase             | 5.93E00       | 2.3E-01  | KIF23,PRC1,CDC20,KIF11,CDC25C,PLK3,CDC7,RAD21,STAG2,PLK4,PLK1,CDK1,CCNB1,FBXO5                    |
| Role of BRCA1 in DNA Damage Response          | 4.81E00       | 1.87E-01 | FANCC,BRE,E2F1,BARD1,SMARCE1,FANCM,BRIP1,BLM,TOPBP1,FANCA,RBL1,RAD51,RFC4,PLK1                    |
| Cell Cycle Control of Chromosomal Replication | 4.62E00       | 3.08E-01 | CDC7,MCM2,ORC6,MCM6,CDT1,DBF4,MCM5,CDC6                                                           |
| Hereditary Breast Cancer Signaling            | 4.03E00       | 1.4E-01  | FANCC,PALB2,MRAS,E2F1,BARD1,SMARCE1,FANCM,H2AFX,CDC25C,BLM,PMS2,CCND1,FANCA,RAD51,RFC4,CDK1,CCNB1 |
| Estrogen-mediated S-phase Entry               | 3.94E00       | 2.92E-01 | CCNE1,CCND1,SKP2,E2F1,CCNA2,RBL1,CDK1                                                             |
| Pancreatic Adenocarcinoma Signaling           | 3.85E00       | 1.47E-01 | TGFA,HBEGF,TGFB3,NOTCH1,BIRC5,E2F1,RALGDS,RELA,SMAD3,CCND1,CCNE1,ERBB2,MDM2,BCL2L1,RAD51          |
| Cell Cycle: G1/S Checkpoint Regulation        | 3.18E00       | 1.67E-01 | TGFB3,CCNE1,CDKN2D,SMAD3,CCND1,SKP2,E2F1,MDM2,RBL1,MAX                                            |

1957

1958

1959

Supplemental Table 3: PGR causes many changes in multiple canonical pathways involved in cell proliferation and cancer. Top canonical pathway list for differentially regulated genes between placebo and RU486 acute treatment in the RNA microarray.

1960

1961

1962

1963

1964

1965

1966

1967

1968

1969

1970

1971

1972

1973

1974

1975

1976

1977

1978

1979

1980

1981

1982

1983

1984

1985

1986

1987

1988

1989

1990

1991

1992  
1993

| Categories                                                                                 | p-Value  | # Mols |
|--------------------------------------------------------------------------------------------|----------|--------|
| Embryonic Development, Organismal Survival                                                 | 1.35E-10 | 28     |
| Cell Cycle                                                                                 | 8.44E-08 | 19     |
| Cell Cycle, DNA Replication, Recombination, and Repair                                     | 3.67E-07 | 15     |
| DNA Replication, Recombination, and Repair                                                 | 6.22E-07 | 17     |
| Cell Cycle, Cellular Assembly and Organization, DNA Replication, Recombination, and Repair | 7.47E-07 | 7      |
| Cancer, Organismal Injury and Abnormalities, Respiratory Disease                           | 2.55E-06 | 27     |
| Cell Death and Survival                                                                    | 2.69E-06 | 120    |
| Cellular Assembly and Organization                                                         | 3.33E-06 | 7      |
| Cellular Compromise, DNA Replication, Recombination, and Repair                            | 6.79E-06 | 10     |
| Cancer, Organismal Injury and Abnormalities                                                | 6.86E-06 | 48     |

1994  
1995  
1996  
1997  
1998  
1999  
2000  
2001  
2002  
2003  
2004  
2005  
2006  
2007  
2008  
2009  
2010  
2011  
2012  
2013  
2014  
2015  
2016  
2017  
2018  
2019  
2020  
2021  
2022  
2023  
2024  
2025  
2026  
2027  
2028  
2029  
2030  
2031

Supplemental Table 4: PGR transcriptionally controls multiple canonical pathways involved in cell proliferation and cancer. Top biological function gene list from Ingenuity Pathway Analysis for the tumor microarray overlapped with the PGR ovarian tumor ChIP-seq analysis. #Mols=number of molecules, p-Value=p-value based on the Ingenuity Pathway Analysis algorithm for analyzing enrichment in a pathway.

2032  
2033  
2034  
2035  
2036  
2037  
2038  
2039  
2040  
2041  
2042  
2043  
2044  
2045  
2046  
2047  
2048  
2049  
2050  
2051  
2052  
2053  
2054  
2055  
2056  
2057  
2058  
2059  
2060  
2061  
2062  
2063  
2064  
2065  
2066  
2067  
2068  
2069  
2070  
2071  
2072  
2073  
2074  
2075  
2076  
2077

| Gene Name (species)            | SYBR Primer Sequence            |
|--------------------------------|---------------------------------|
| <i>Cdc25c</i> F (Mus musculus) | TTGCAAAGCGTAGCACATCTG           |
| <i>Cdc25c</i> R (Mus musculus) | AAGGACCCGCGTCAATCA              |
| <i>Plk1</i> F (Mus musculus)   | CCCGCTGGCGAAAGAAATTC            |
| <i>Plk1</i> R (Mus musculus)   | CATTTGGCGAAGCCTCCTTTA           |
| <i>Ptgs1</i> F (Mus musculus)  | TTGCACATCCATCCACTCCC            |
| <i>Ptgs1</i> R (Mus musculus)  | AATTCGGAAGCCAGGTCCAG            |
| <i>Ptgs2</i> F (Mus musculus)  | TTCAACACACTCTATCACTGGC          |
| <i>Ptgs2</i> R (Mus musculus)  | AGAAGCGTTTGCGGTACTION           |
| <i>Gata4</i> F (Mus musculus)  | CCCTACCCAGCCTACATGG             |
| <i>Gata4</i> R (Mus musculus)  | ACATATCGAGATTGGGGTGTCT          |
| <i>Foxl2</i> F (Mus musculus)  | ACAACACCCGGAGAAACCAGAC          |
| <i>Foxl2</i> R (Mus musculus)  | CGTAGAACGGGAACCTGGCTA           |
| <i>Inhbb</i> F (Mus musculus)  | CTTCGTCTCTAATGAAGGAACC          |
| <i>Inhbb</i> R (Mus musculus)  | CTCCACCACATTCCACCTGTC           |
| <i>Foxo1</i> F (Mus musculus)  | AGTGGATGGTGAAGAGCGTG            |
| <i>Foxo1</i> R (Mus musculus)  | GAAGGGACAGATTGTGGCGA            |
| <i>Pgr</i> F (Mus musculus)    | CTCCGGGACCGAACAGAGT             |
| <i>Pgr</i> R (Mus musculus)    | ACAACAACCCTTTGGTAGCAG           |
| <i>Esr1</i> F (Mus musculus)   | AAGTGTACGAAGTGGGCATGA           |
| <i>Esr1</i> R (Mus musculus)   | CTCTCTGACGCTTGTGCTTCAA          |
| <i>Esr2</i> F (Mus musculus)   | CTGTTACTAGTCCAAGCGCCA           |
| <i>Esr2</i> R (Mus musculus)   | CCCAGATGCATAATCACTGCA           |
| Gene Name (species)            | Applied Biosystems Taqman Cat # |
| <i>Hand2</i> (Mus musculus)    | Mm00439247_m1                   |
| <i>Ccnd1</i> (Mus musculus)    | Mm00432359_m1                   |
| <i>Foxm1</i> (Mus musculus)    | Mm00514924_m1                   |
| <i>Cdk1</i> (Mus musculus)     | Mm00772471_m1                   |
| <i>Ccnb1</i> (Mus musculus)    | Mm00838401_g1                   |

Supplemental Table 5: Complete list of SYBR primer sequences and Applied Biosystems Taqman probe catalog numbers.
